# Supplementary material for: Enhanced electrical and luminescent performance of a porous silicon/MEH-PPV nanohybrid synthesized by anodization and repeated spin coating
Source: Royal Society of Chemistry journal article supplement (doi:10.1039/c5ra18407j), 2015-01-01
Supplement: c5ra18407j1.pdf [file c5ra18407j1.pdf]

## Supplementary Information

### **Enhanced electrical and luminescent performance of porous silicon/MEH-PPV nanohybrid synthesized by anodization and repeated spin coating**

A. M. S. Salem,<sup>a</sup> F. A. Harraz,<sup>a,†</sup> S. M. El-Sheikh,<sup>a</sup> H. S. Hafez,<sup>b</sup> I. A. Ibrahim<sup>a</sup> and M. S. A. Abdel Mottaleb<sup>c</sup>

---

<sup>a.</sup> Nanostructured Materials and Nanotechnology Division, Central Metallurgical Research and Development Institute (CMRDI), P.O. Box: 87 Helwan, Cairo 11421 Egypt.

<sup>b.</sup> Environmental Studies and Research Institute, Sadat University, Sadat City, Egypt.

<sup>c.</sup> Nano-Photochemistry and Solar Chemistry Labs., Department of Chemistry, Faculty of Science, Ain Shams University, Abbassia, Cairo, Egypt.

† E-mail: [fharraz68@yahoo.com](mailto:fharraz68@yahoo.com); Tel: +20-27142452; Fax: +20-27142451

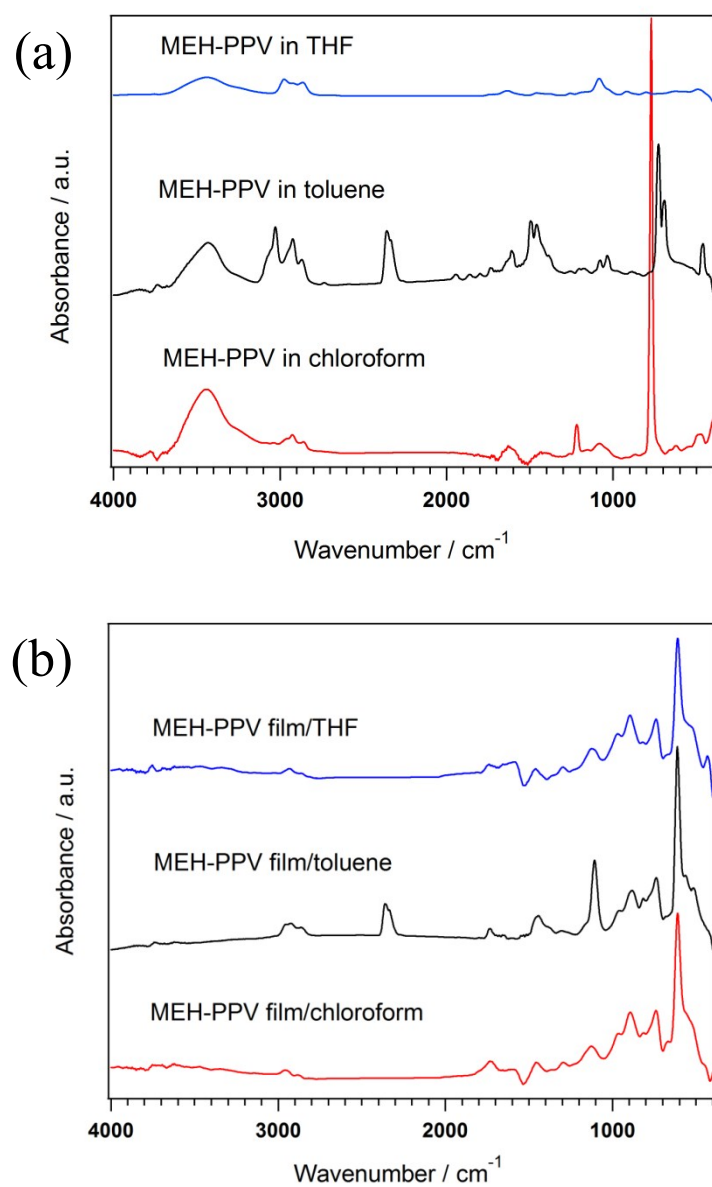

**Fig. S1** FT-IR spectra recorded for; (a) MEH-PPV dissolved in different organic solvents and (b) spin coated MEH-PPV film using different solvents into the porous silicon.

**Table S1** FTIR peak assignments for MEH-PPV dissolved in different solvents and for as-formed films prepared by spin coating into the porous silicon.

| Toluene<br>Peak position cm <sup>-1</sup> |                          | THF<br>Peak position cm <sup>-1</sup> |                              | Chloroform<br>Peak position cm <sup>-1</sup> |                              | Peak assignments                                                  |
|-------------------------------------------|--------------------------|---------------------------------------|------------------------------|----------------------------------------------|------------------------------|-------------------------------------------------------------------|
| Solution                                  | Deposited film           | Solution                              | Deposited film               | Solution                                     | Deposited film               |                                                                   |
| 3740(w)<br>3650-3120<br>(3432)(br)        |                          | 3700-<br>3100<br>(3440)(br)           |                              | 3780(w)<br>3680-<br>3100<br>(3445)(br)       |                              | -O-H stretching of water<br>dissociation and non-<br>dissociation |
| 3030(s)                                   |                          |                                       |                              |                                              |                              | -Aromatic =C-H stretch                                            |
|                                           | 2950                     |                                       | 2950(w)                      |                                              | 2958(w)                      | -CH <sub>3</sub> antisymmetric stretch                            |
| 2924<br>2920(s)                           | 2924                     |                                       |                              | 2926(w)                                      |                              | -C-H stretch of the alkyl                                         |
| 2865                                      | 2863(w)                  | 2870(W)                               | 2890(w)                      | 2880(w)                                      | 2887(w)                      | -CH <sub>2</sub> symmetric stretch                                |
| 1940(w)<br>1880 (w)<br>1800(w)<br>1732(w) | 1736(w,br)               |                                       | 1737(w,br)                   |                                              | 1734(w,br)                   | -(2000-1665 cm <sup>-1</sup> ) weak<br>band known as "overtones)  |
| 1607                                      |                          | 1637(W)                               |                              | 1629                                         |                              | -O-H bending vibration of<br>water                                |
| 1590<br>1494(br)                          | 1593(w)<br>1450(W, br)   |                                       | 1590(w)<br>1459(br)          |                                              | 1596(w)<br>1457(br)          | -C-C stretch (in-ring)<br>-C-C stretch aromatic<br>ring)          |
| 1457(br)                                  |                          |                                       |                              | 1432                                         |                              | - C-H umbrella bend                                               |
|                                           | 1295(w,br)               |                                       | 1296(w,br)                   |                                              | 1294(w,br)                   | -CH <sub>3</sub> symmetric<br>deformation                         |
|                                           | 1108(s,br)               |                                       | 1122(br)                     |                                              | 1120(br)                     | -Si-O-Si stretching                                               |
| 1078 (w)<br>1033 (w)                      |                          | 1083(s)                               |                              | 1082                                         |                              | -C-H bending in plane                                             |
|                                           | 894(w)                   |                                       | 895(w)                       |                                              | 893(w)                       | -SiOH bend                                                        |
| 850-630<br>(820, 810)<br>(s, W)           | 814                      | 801(w)                                |                              |                                              |                              | C-H "oop" aromatic<br>substitution                                |
|                                           |                          |                                       |                              | 771(s)                                       |                              | -C-Cl stretch                                                     |
|                                           | 740(br)<br>630-490(s, W) |                                       | 739(br)<br>635-490<br>(s, W) |                                              | 739(br)<br>626-490<br>(s, W) | -Out of plane ring bend of<br>phenyl ring                         |
| 464                                       | 464(w)                   | 491(w)                                | 462(W)                       | 472(w)                                       | 461(w)                       | -C-H bend (medium)<br>- Si-O-Si                                   |

*br (broad), s (strong and sharp), W (wide), w (weak), Bands in red color are related to the solvents (THF, toluene and chloroform), Bands in blue color are related to MEH-PPV films deposited into PSi and solvents, Bands in **black color** for Si wafer.*

**Fig. S1** (a,b) represents the FT-IR spectra measured between 400~4000  $\text{cm}^{-1}$  for the MEH-PPV dissolved in different solvents (THF, toluene and chloroform) and the spin coated MEH-PPV films into the PSi templates. The assignments of the absorption bands were done according to earlier work<sup>1-4</sup>. The characteristic peaks for the polymeric solutions and for deposited films, along with the complete assignments of the bands are listed in **Table S1**. It can be observed from the data collected in **Table S1** and **Fig. S1(a)** that the bands position and type recorded from the solutions containing polymer displayed strong absorption bands at 1637-1607 as well as a broad band between 3100 and 3780  $\text{cm}^{-1}$ . It can be deduced that the appearance of the latter bands is ascribed to the surface-(OH) stretching vibration of the coordinated water molecule groups originating from dissociation chemisorbed and non-dissociated water molecules. On other hand, it can be noticed that, the bands appeared at 2926-2920, 1457-1432, 850-630, 491-464  $\text{cm}^{-1}$  revealed the characteristic shapes of -CH- in different solvents. Meanwhile, it can be deduced that the solvation power of toluene is higher than chloroform and THF. This can be attributed to the band intensities of MEH-PPV polymer are higher and clear in toluene more than chloroform and THF. Moreover, MEH-PPV polymer reveals broad and strong bands at 1590, 1494, 850-630  $\text{cm}^{-1}$  in toluene compared with chloroform or THF solvents. Additionally, it is worth to note that the strong absorption bands at 1637-1607 as well as a broad band between 3100 and 3780  $\text{cm}^{-1}$  characteristic to O-H stretching are disappeared in the deposited MEH-PPV films, which can be attributed to the evaporation of the solvents during drying of the samples. It can be also observed that the intensities of the absorption bands of the deposited MEH-PPV film produced from toluene are strong and sharp compared to other solvents. Moreover, the strong bands appearing at 1108-1122  $\text{cm}^{-1}$  are assigned to Si-O-Si stretching mode appeared for the PSi deposited polymeric film in all solvents, whereas the small bands appearing at 464-461  $\text{cm}^{-1}$  are assigned to the Si-O-Si asymmetric stretching mode.

## References

- 1 M. Ram, N. Sarkar, P. Bertoncello, A. Sarkar, R. Narizzano, C. Nicolini, *Synthetic Metals*, 2001, **122**, 369.
- 2 N. Juhari, W. H. A. Majid and Z. A. Ibrahim, *Solid State Sci. Technol.*, 2007, **15**, 141.
- 3 Polymeric semiconductors, J. Liu, Y. Shi, T.-F. Guo and Y. Yang, in *Handbook of Electroluminescent Materials*, eds. D. R. Vij, IOP Publishing Ltd 2004, pp.543-546.
- 4 The control of morphology and the morphological dependence of device electrical and optical properties in polymer electronics, Y. Yang, Y. Shi, J. Liu and T.-F. Guo, in *Electronic and Optical Properties of Conjugated Molecular Systems in Condensed Phases*, eds. S. Hotta, Research Signpost 2003, pp.307-354.
